# Supplementary material
Source: Springer Nature journal article supplement (https://www.springermedizin.de/resource/supplementary/12881_2011_934_MOESM7_ESM.pdf/9451578)

***BCL2L13***

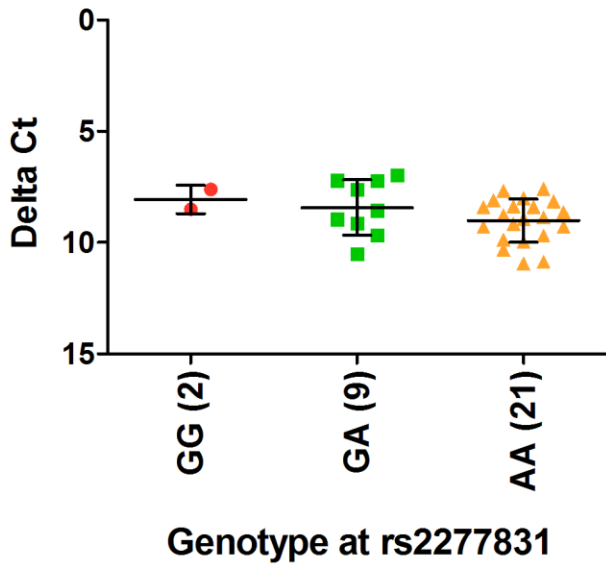

***BID***

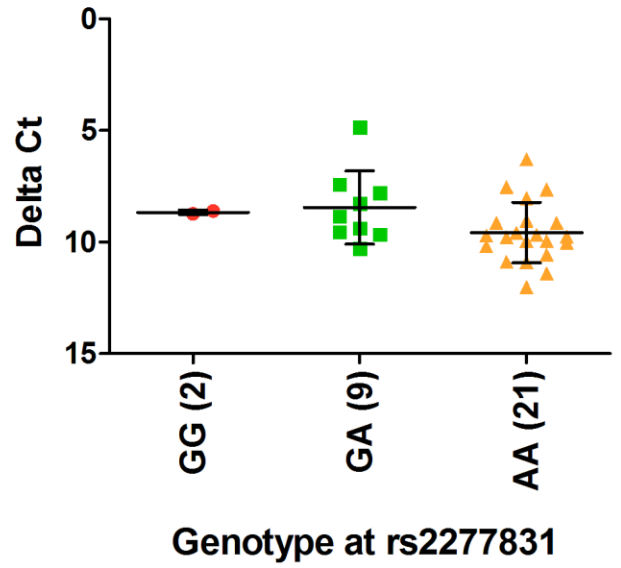

***MICAL3***

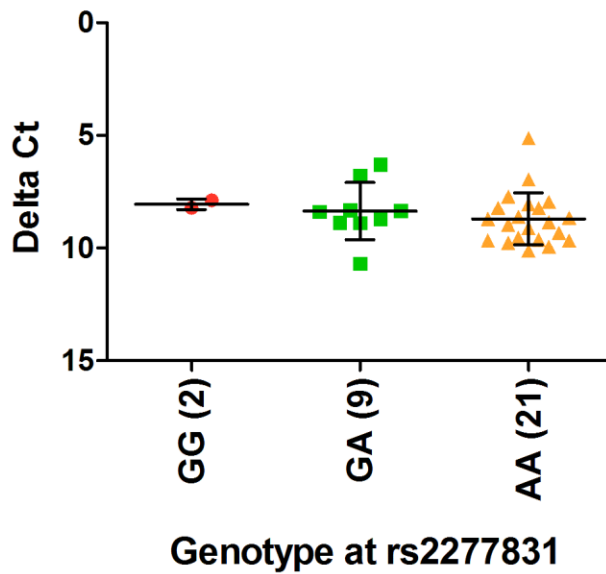

Supplement: MOESM7 [file 9451578]
